# THE JOURNAL OF NEUROPSYCHIATRY and Clinical Neurosciences

The Official Journal of the American Neuropsychiatric Association

## In this issue:

- The Value of Quantitative Electroencephalography in Clinical Psychiatry: A Report by the Committee on Research of the American Neuropsychiatric Association
- Aggression and Quantitative MRI Measures of Caudate in Patients With Chronic Schizophrenia or Schizoaffective Disorder
- The Neuropsychiatric Profile of Addison's Disease: Revisiting a Forgotten Phenomenon
- A Pilot Study of Quetiapine Treatment of Aggression Due to Traumatic Brain Injury

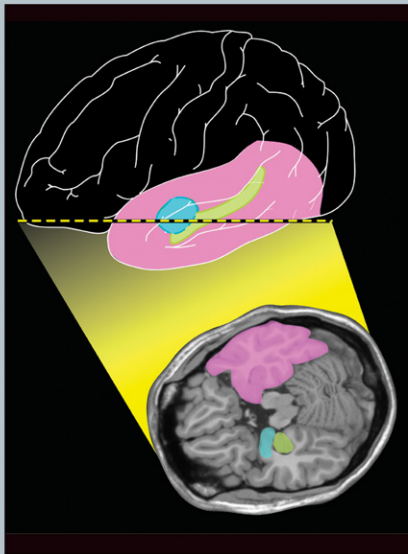

Volume 18 • Number 4 • Fall 2006

Visit our web site at:  
[neuro.psychiatryonline.org](http://neuro.psychiatryonline.org)

# Essential Titles in Neuropsychiatry

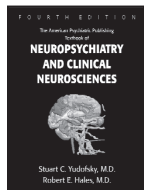

## The American Psychiatric Publishing Textbook of Neuropsychiatry and Clinical Neurosciences, Fourth Edition

Edited by **Stuart C. Yudofsky, M.D.**, and **Robert E. Hales, M.D., M.B.A.**

The fourth edition of this tremendously successful volume expands its focus on the neurosciences and covers topics such as the epidemiology and genetics of neuropsychiatric disorders, the neuropsychiatric aspects of delirium, the growth in clinical knowledge and clinical relevance of drug-induced delirium and encephalopathies other than delirium, and educational and certification issues in neuropsychiatry.

2002 • 1398 pages • ISBN 1-58562-004-1 • Hardcover • \$259.00 • Item #62004

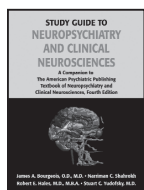

## Study Guide to Neuropsychiatry and Clinical Neurosciences

A Companion to The American Psychiatric Publishing Textbook of Neuropsychiatry and Clinical Neurosciences, Fourth Edition

James A. Bourgeois, O.D., M.D., Narriman C. Shahrokh, Robert E. Hales, M.D., M.B.A., and Stuart C. Yudofsky, M.D.

The *Study Guide* is made up of 259 questions divided into 39 individual quizzes of 5-10 questions each that correspond to chapters in *The American Psychiatric Publishing Textbook of Neuropsychiatry and Clinical Neurosciences, Fourth Edition*. Questions are followed by an Answer Guide that references relevant text (including the page number) in the *Textbook* to allow quick access to needed information. Each answer is accompanied by a discussion that addresses the correct response and also explains why other responses are not correct.

2006 • 200 pages • ISBN 1-58562-259-1 • Paperback • \$29.95 • Item #62259

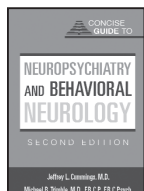

## Concise Guide to Neuropsychiatry and Behavioral Neurology, Second Edition

Jeffrey L. Cummings, M.D., and Michael R. Trimble, M.D., F.R.C.P., F.R.C.Psych.

This popular pocket guide presents brief synopses of the major neuropsychiatric and neurobehavioral syndromes, discusses their clinical assessment, and provides guidelines for management, plus a glossary, index, and bibliographies that refer to more extensive reading.

2002 • 304 pages • ISBN 1-58562-078-5 • Paperback • \$32.95 • Item #62078

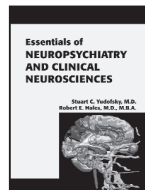

## Essentials of Neuropsychiatry and Clinical Neurosciences

Edited by **Stuart C. Yudofsky, M.D.**, and **Robert E. Hales, M.D., M.B.A.**

This book functions as a subspecialty reference that details assessment techniques and the full range of treatments available for patients with neuropsychiatric disorders. Like the tremendously successful fourth edition, this abridged version stands out because of its impressive clinical utility and practicality and because of the singular expertise of its preeminent chapter authors.

2004 • 770 pages • ISBN 1-58562-005-X • Paperback • \$79.00 • Item #62005

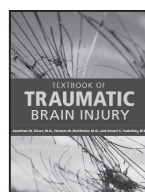

## Textbook of Traumatic Brain Injury

Edited by **Jonathan M. Silver, M.D.**, **Thomas W. McAllister, M.D.**, and **Stuart C. Yudofsky, M.D.**

Extensively updated and expanded by recognized experts, this comprehensive textbook contains 40 chapters, including 15 new for this edition, and more than 100 informative figures and illustrations. New chapters address structural and functional imaging, electrophysiologic techniques, neuropsychological assessment, social issues, systems of care, and treatment modalities, including alternative therapies. Expanded chapters discuss the multiple neuropsychiatric sequelae but not encompassed by the usual psychiatric syndromes, including apathy, reduced awareness of deficits, fatigue, pain, headaches, balance problems, visual difficulties, and sports injuries.

2005 • 792 pages • ISBN 1-58562-105-6 • Hardcover • \$109.00 • Item #62105

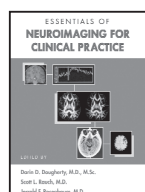

## Essentials of Neuroimaging for Clinical Practice

Edited by **Darin D. Dougherty, M.D., M.Sc.**, **Scott L. Rauch, M.D.**, and **Jerrold F. Rosenbaum, M.D.**

The use of neuroimaging in psychiatry is exploding, yet clinicians are often unclear about which studies to use to obtain the best diagnostic results in specific situations. *Essentials of Neuroimaging for Clinical Practice* demystifies the uses of these powerful techniques. An ideal clinical guide for doctors and residents, it offers clear, concise, and practical advice on how to use today's most advanced applications in the diagnostic workup of patients. In addition, it explores implications of each modality for future practice and research.

2004 • 162 pages • ISBN 1-58562-079-3 • Hardcover • \$52.00 • Item #62079

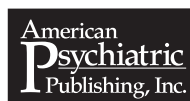

1-800-368-5777 | [www.appi.org](http://www.appi.org)

Please reference priority code AH618 when ordering.
