The 18th Annual Meeting of the

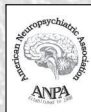

**American  
Neuropsychiatric  
Association**

## **Educational Needs Assessment**

The understanding of the anatomic and physiological substrates of complex human behavior represents the foundation for contemporary practice in neuropsychiatry and behavioral neurology. Recent advances in imaging technologies have created new insights into the pathophysiology of many common disorders. The role of subcortical structures including the basal ganglia and white matter pathways has increasingly been recognized. These same technologies have led to the neuropsychiatric investigation of concepts at the very core of humanity such as consciousness and mind-brain dualism. The field of neuropsychiatry is also at the forefront of our need to understand conditions that have broad societal impact such as aggression. New central and peripheral brain stimulation techniques have become increasingly available, and will open new avenues for the management of neuropsychiatric illness. Finally, contemporary practice in the clinical neuroscience disciplines requires that neuropsychiatrists, behavioral neurologists, and neuropsychologists maintain awareness of new research in the broad array of illnesses that comprise these fields including Dementia, Epilepsy, Schizophrenia, Depression, Brain Imaging, Pediatric Neuropsychiatry, Stroke, and Traumatic Brain Injury.

## **ANPA Membership**

The American Neuropsychiatric Association (ANPA) established in 1988, is an organization of professionals in neuropsychiatry and the clinical neurosciences dedicated to understanding the links between neuroscience and behavior and to developing effective diagnosis and treatment for patients with Neuropsychiatric disorders. We invite you to join the ANPA. For membership information visit the ANPA web site at: [www.anpaonline.org](http://www.anpaonline.org) or contact the ANPA office: [anpa@osu.edu](mailto:anpa@osu.edu).

ANPA

**February 17 – 20, 2007  
Hilton Tucson El Conquistador  
Golf & Tennis Resort**

# Tucson Arizona

## **Objectives of the 18th Annual Meeting**

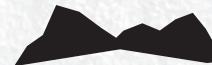

*To be able to define and describe:*

- *The impact of discoveries in neuroanatomy on clinical insights in neuropsychiatry.*
- *The neuroscience of subjective consciousness and its potentially impact on our understanding of neuropsychiatric disorders and their treatment.*
- *The functional neuroanatomy of aggression control.*
- *Brain stimulation techniques in the treatment of neuropsychiatric disorders.*
- *Neuropsychiatric correlates of frontotemporal dementias*

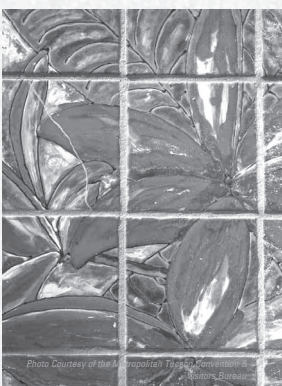

## **Objectives of the Pre-Meeting Workshops**

*To be able to define and describe:*

- *The functional neuroanatomy of the basal ganglia and its disorders*
- *Subcortical vascular disease*
- *Parkinsonian disorders with dementia*
- *The functional neuroanatomy of white matter pathways and its neurobehavioral aspects*

## **Accreditation**

The Ohio State University Medical Center, Center for Continuing Medical Education is accredited by the Accreditation Council for Continuing Medical Education (ACCME) to sponsor continuing medical education for physicians.

The Ohio State University Medical Center designates this educational activity for a maximum of *26.5 AMA PRA Category 1 Credits™*. Physicians should only claim credit commensurate with the extent of their participation in the activity.

This activity has been planned and implemented in accordance with the Essential Areas and policies of the Accreditation Council for Continuing Medical Education through the joint sponsorship of The Ohio State University Medical Center and the American Neuropsychiatric Association. The Ohio State University Medical Center is accredited by the ACCME to provide continuing medical education for physicians.

The 18th Annual Meeting of the American Neuropsychiatric Association is approved for a maximum of *20 AMA PRA Category 1 Credits™*. The Pre-meeting Workshops are approved for a maximum of *6.5 AMA PRA Category 1 Credits* (The Neuropsychiatry of Subcortical Disorders Part I – 2 credits, The Neuropsychiatry of Subcortical Disorders Part II – 2 credits and White Matter Matters – 2.5 credits)

Psychology continuing education credits will be offered under the auspices of the International Neuropsychological Society. The International Neuropsychological Society is approved by the American Psychological Association to sponsor continuing education credits for psychologists. The International Neuropsychological Society maintains responsibility for this program and its content. The 18th Annual Meeting of the American Neuropsychiatric Association is approved for a maximum of *20 CE credits* and the Pre-meeting Workshops meet the criteria for up to *6.5 credits total* (The Neuropsychiatry of Subcortical Disorders Part I – 2 credits, The Neuropsychiatry of Subcortical Disorders Part II – 2 credits and White Matter Matters – 2.5 credits).

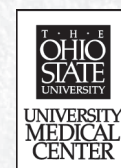

700 Ackerman Road, Suite 625 • Columbus, Ohio USA 43202 • Phone: 614-447-2077

**Earn up to 26.5 CME Credits for Physicians  
or 26.5 CE Credits for Psychologists**

**Online registration available at:  
[www.anpaonline.org](http://www.anpaonline.org)**

## Invited Faculty

**Karen E. Anderson, M.D.**  
University of Maryland  
Medical Center  
Baltimore, Maryland

**Kevin J. Black, M.D.**  
Washington University School  
of Medicine  
St. Louis, Missouri

**Monte S. Buchsbaum, M.D.**  
Mount Sinai School of Medicine  
New York, New York

**John J. Campbell, M.D.**  
University of Vermont College  
of Medicine  
Portland, Maine

**Helena C. Chui, M.D.**  
Alzheimer's Disease Research  
Center of California  
University of Southern California,  
Rancho Los Amigos  
Downey, California

**C. Edward Coffey MD**  
Henry Ford Health System  
Detroit, Michigan

**Miles G. Cunningham,  
M.D., Ph.D.**  
Harvard University  
Belmont, Massachusetts

**James D. Duffy, M.D.**  
Cornell University  
Houston, Texas

**Dr. Dominic ffytche**  
King's College London  
University of London  
London, England

**Christopher M. Filley, M.D.**  
University of Colorado Health  
Science Center  
Denver, Colorado

**David T. George, M.D.**  
National Institutes of Health  
Bethesda, Maryland

**Temple Grandin, Ph.D.**  
Colorado State University  
Ft. Collins, Colorado

**Stuart Hameroff, M.D.**  
The University of Arizona  
Center for Consciousness  
Studies  
Tucson, Arizona

**Robin A. Hurley, M.D.**  
Hefner Veterans Administration  
Medical Center  
Salisbury, North Carolina

**Daniel I. Kaufer, M.D.**  
The University of North Carolina  
at Chapel Hill  
Chapel Hill, North Carolina

**Kent A. Kiehl, Ph.D.**  
Yale University School of  
Medicine  
Hartford, Connecticut

**Edward C. Lauterbach, M.D.**  
Mercer University School  
of Medicine  
Macon, Georgia

**Andres M. Lozano, M.D.**  
University of Toronto  
Toronto, Canada

**Helen S. Mayberg, M.D.**  
Emory University School  
of Medicine  
Atlanta, Georgia

**Mario F. Mendez, M.D., Ph.D.**  
University of California  
Los Angeles, California

**Fred Ovsiew, M.D.**  
University of Chicago  
Chicago, Illinois

**Adrian Raine, Ph.D.**  
University of Southern  
California, Los Angeles  
Los Angeles, California

**Shirlene M. Sampson, M.D.**  
Mayo Clinic  
Rochester, Minnesota

**Clifford Saper, M. D., Ph. D.**  
Beth Israel Deaconess  
Medical Center  
Harvard Medical School  
Boston, Massachusetts

**Jeremy Schmahmann, M.D.**  
Massachusetts General  
Hospital  
Harvard Medical School  
Boston, Massachusetts

**Katherine H. Taber, Ph.D.**  
Veterans Affairs Mid Atlantic  
Mental Illness Research,  
Education, and  
Clinical Center  
Salisbury, North Carolina

**Evan Thompson, Ph.D.**  
University of Toronto  
Toronto, Canada

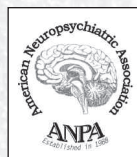

## Disclosure Statement

*The Center for Continuing Medical Education expects that participants in CME activities should be made aware of any affiliation or financial interest that may affect the speaker's presentation(s). All speakers have been requested to complete a conflict of interest statement. Disclosure statements will be provided to participants at the meeting.*

The 18th Annual Meeting of the ANPA

Jointly Sponsored by:  
The Ohio State University Medical Center  
The American Neuropsychiatric Association

With special participation of The International  
Neuropsychological Society and The Society for  
Behavioral and Cognitive Neurology

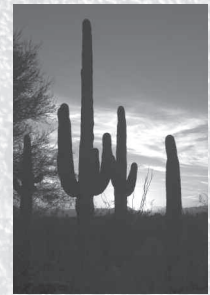

## Scientific Program Committee Members

**Chair: Tiffany Chow, M.D.**  
University of Toronto  
Toronto, Canada

**Robert A. Bornstein, Ph.D.**  
The Ohio State University  
Columbus, Ohio

**John J. Campbell, M.D.**  
University of Vermont College  
of Medicine  
Portland, Maine

**Miles G. Cunningham, M.D., Ph.D.**  
Harvard University  
Belmont, Massachusetts

**James D. Duffy, M.D.**  
Cornell University  
Houston, Texas

**Mario F. Mendez, M.D., Ph.D.**  
University of California Los Angeles  
Los Angeles, California

**Fred Ovsiew, M.D.**  
University of Chicago  
Chicago, Illinois

**Alan J. Rubin, M.D.**  
Drexel University College  
of Medicine  
Marlton, New Jersey

**R. Andrew Sewell, M.D.**  
McLean Hospital  
Belmont, Massachusetts

**Daniel R. Wilson, M.D., Ph.D.**  
Creighton University  
Omaha, Nebraska

**Tucson  
Arizona**

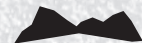

February 17 - 20, 2007

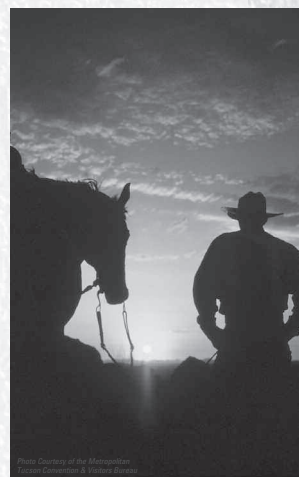

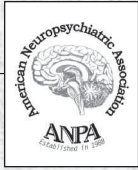

# ANPA's 18th Annual Meeting

*\* Indicates sessions that may be of particular interest to individuals seeking subspecialty certification in Behavioral Neurology & Neuropsychiatry.*

## ANPA Pre-Meeting Workshop

**Saturday, February 17, 2007**

**8:00 am – 10:00 am**

**The Neuropsychiatry of Subcortical Disorders Part I**

Chair: John J. Campbell, M.D.

**\* Functional Neuroanatomy of the Basal Ganglia**

Robin A. Hurley, M.D.

Katherine H. Taber, Ph.D.

**\* Basal Ganglia Disorders**

Karen E. Anderson, M.D.

**10:15 am – 12:15 pm**

**The Neuropsychiatry of Subcortical Disorders Part II**

Chair: John J. Campbell, M.D.

**\* Subcortical Vascular Disease**

Helena C. Chui, M.D.

**\* Parkinsonian Disorders with Dementia**

Daniel I. Kaufer, M.D.

**12:45 pm – 3:30 pm – Box Lunch will be served**

**Society for Behavioral and  
Cognitive Neurology Workshop  
White Matter Matters**

**\* Overview and Case Presentation**

Daniel I. Kaufer, M.D.

**\* Functional Neuroanatomy of White Matter Pathways**

Robin A. Hurley, M.D.

**\* Neurobehavioral Aspects of White Matter**

Christopher M. Filley, M.D.

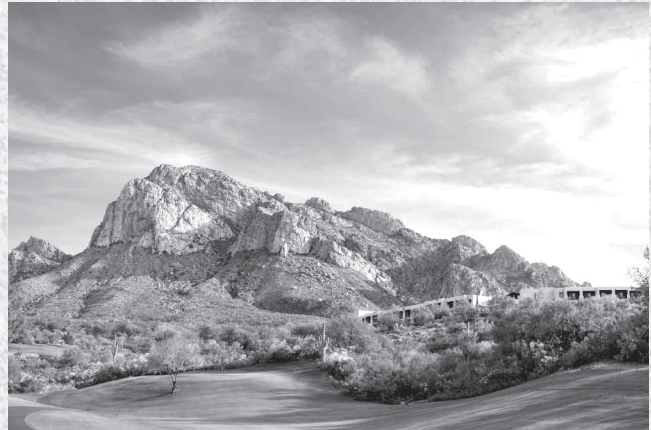

## ANPA Meeting Schedule

**Sunday, February 18, 2007**

**1:00 pm – 1:15 pm**

**Welcoming Remarks**

Richard M. Restak, M.D., President

Tiffany Chow, M.D., Chair, Scientific Program Committee

**1:15 pm – 2:15 pm**

**CNPA-Peter Bassoe Lecture**

**How Does Thinking in Pictures Lead to Moral  
Decision-Making?**

Temple Grandin, Ph.D.

**2:30 pm – 4:30 pm**

**Poster Session I and Hot Topic Presentations**

Hot Topics will begin at 4:00 pm

**4:30 pm – 5:45 pm**

**\*Report from Committee on Research**

**Neuropsychiatric Correlates of Frontotemporal Dementias:  
Psychosis, Mood Disorders, Personality Changes and  
Movement Disorders**

Mario F. Mendez, M.D., Ph.D.

Kevin J. Black, M.D.

Edward C. Lauterbach, M.D.

Shirlene M. Sampson, M.D.

**6:30 pm**

**Sunset Reception**

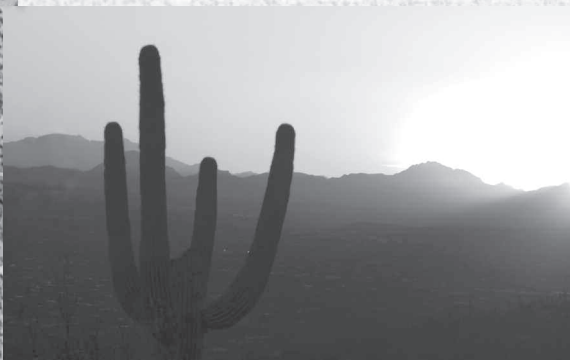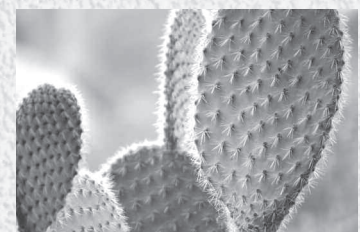

# ANPA Meeting Schedule *continued*

## Monday, February 19, 2007

**8:00 am – 11:15 am**

### **Presidential Symposium: Developments in Behavioral Neuroanatomy**

**Session Chair: Fred Ovsiew, M.D.**

New technologies have led to new understandings of the brain circuits that subserve mentation and behavior. For example, discovery of a neurotransmitter and its pathways has revolutionized the understanding of narcolepsy, and imaging of fiber tracts with diffusion tensor MRI techniques has advanced the classical agenda of connectionist behavioral neurology. The session will explore the impact of discoveries in neuroanatomy on clinical insight in neuropsychiatry.

### **The Visual Brain and Its Perceptual Pathologies**

**Dr. Dominic ffytche**

### **Neurobiology of Sleep and Insomnia**

**Clifford Saper, M.D., Ph.D.**

### **\* Fiber Pathways of the Brain: Bridging Structure and Function**

**Jeremy Schmahmann, M.D.**

**11:30 am – 12:30 pm**

### **Lunch and Small Group Discussions**

**Followed by afternoon break**

**3:00 pm – 6:30 pm**

### **Exploring the Neural Basis of Consciousness and Contemplative States**

**Session Chair: James D. Duffy, M.D.**

Recent advances in functional neuroimaging have provided neuroscientists with mechanisms for crossing the Cartesian divide between mind and brain. Building upon the heritage of William James, neuroscientists, neurophilosophers and spiritual adepts are working together to rigorously explore the scientific correlates of consciousness and contemplative states. This symposium reviews the emergence of "a neuroscience of subjective consciousness" that can potentially provide important insights into neuropsychiatric disorders and their treatment.

### **Toward the First Revolution in the Mind Sciences**

**Evan Thompson, Ph.D.**

### **The Neural Substrates of Consciousness**

**Stuart Hameroff, M.D.**

### **The Contemplative Brain: The Neural Correlates of Meditation and Religious Experience**

**James D. Duffy, M.D.**

### **Case Vignettes**

**Chair: Miles G. Cunningham, M.D., Ph.D.**

**Discussants: Session Speakers**

## Tuesday, February 20, 2007

**8:00 am – 11:15 am**

### **What Are the Sociobiological Bases for Aggression?**

**Session Chair:**

**Monte S. Buchsbaum, M.D.**

This symposium will review how the prefrontal cortex modulates centers deeper in the brain allowing social rules, future plans, and emotional demands to be weighed for execution. Together, the panel will focus on the functional neuroanatomy of aggression control and new findings about how components of the prefrontal and limbic systems work together or fail to function.

### **Imaging Frontal Lobe Function**

**Monte S. Buchsbaum, M.D.**

### **Imaging Findings in Psychopathy**

**Kent A. Kiehl, Ph.D.**

### **A Model Linking Biology, Behavior and Psychiatric Diagnoses in Perpetrators of Domestic Violence**

**David T. George, M.D.**

### **\* The Neuroanatomical Basis of Antisocial, Aggressive Behavior**

**Adrian Raine, Ph.D.**

**11:15 am – 12:15 pm**

### **Lunch and ANPA Business Meeting**

**Open to all participants**

**12:30 – 4:15 pm**

### **Brain Stimulation Therapies in Neuropsychiatry**

**Session Chair: C. Edward Coffey MD**

One of the holy grails in neuropsychiatry is a tool for modifying the function of selective pathways within the nervous system. Recent advances in neuroscience and brain stimulation technology are moving this vision closer to reality. In this symposium we will provide a state-of-the-art review of brain stimulation techniques which offer great promise for improving the health and well being of patients with neuropsychiatric disorders.

### **Peripheral Brain Stimulation Treatments for Mood Disorders**

**C. Edward Coffey, M.D.**

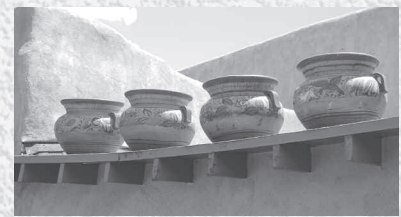

### **Deep Brain Stimulation for Treatment of Mood Disorders**

**Helen Mayberg, M.D.**

### **Brain Stimulation Therapies in Neuropsychiatry**

**Andres Lozano, M.D.**

### **Case Vignettes**

**Chair: Miles G. Cunningham, M.D., Ph.D.**

**Discussants: Session Speakers**

**4:15 pm – 6:15 pm**

### **Poster Session II and Hot Topic Presentations**

**Hot Topics will begin at 5:45 pm**

**Moderators to be determined**

**6:30 pm – 9:00 pm**

### **Annual Banquet**

**Young Investigator Award Presentations**

**Career Development Award Presentation**

**ANPA Fellowship Presentations**

### **Presidential Address**

**What is a Neuropsychiatric Disease?**

**Fred Ovsiew, M.D.**

*\* Indicates sessions that may be of particular interest to individuals seeking subspecialty certification in Behavioral Neurology & Neuropsychiatry.*

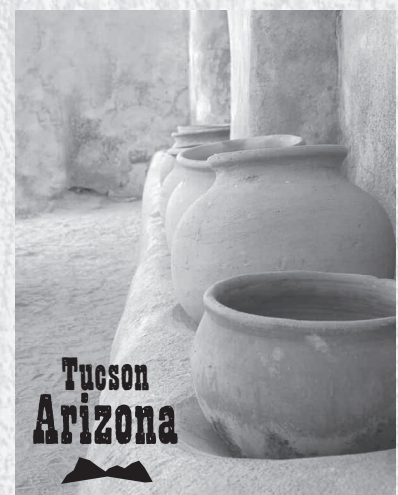

## Hotel Information

# The Hilton Tucson El Conquistador Golf & Tennis Resort

10000 North Oracle Road, Tucson, Arizona 85704 • Reservations: (800) 325-7832 • Business: (520) 544-5000  
Fax: (520) 544-1226, TDD (520) 544-1833 • [www.HiltonElConquistador.com](http://www.HiltonElConquistador.com)

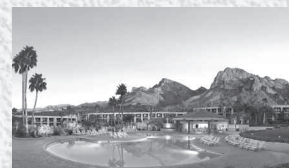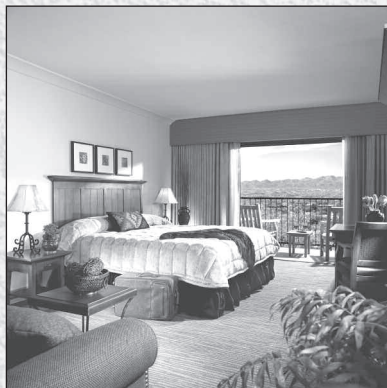

The Hilton Tucson El Conquistador Golf & Tennis Resort is Tucson's true destination resort. The resort offers 45-holes of championship golf, 31-lighted tennis courts, the Desert Springs Water Oasis, two fitness centers with custom spa services, horseback riding, biking and so much more. The Desert Springs Oasis features a brand new 143-foot "Sliderock" waterslide. Luxurious accommodations afford you with upgraded amenities such as the Hilton Serenity Bed, plush guest robes, stocked mini-bars, in-room coffee makers, personal safes and iron and ironing board. Each room offers a private patio or balcony overlooking the resort courtyard, lush desert landscape or city views. The resort also offers five distinctive restaurants.

A block of rooms has been reserved at the Hilton El Conquistador Golf & Tennis Resort. Please make your hotel reservation

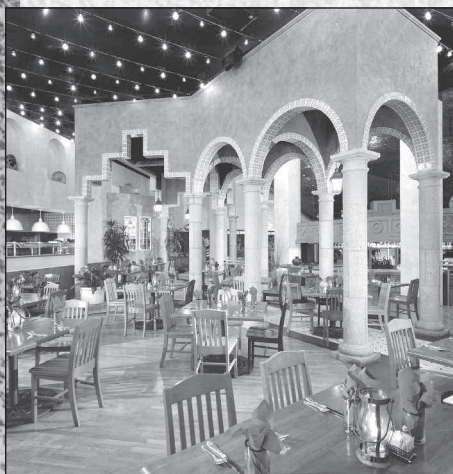

as soon as possible. In order to receive the special conference room rate of \$199 you must use the group code of NEU when making reservations. The cut-off date for reservations is Thursday, January 25, 2007. Check in time is 4:00 p.m. and check-out time is 12:00 noon.

A limited number of student rooms at a rate of \$165 will be available. For details please contact the ANPA office at: [anpa@osu.edu](mailto:anpa@osu.edu).

Phone reservations: **Toll free 800-325-7832**. To receive the meeting rate use the group code of NEU.

On line reservations go to: [http://www.hilton.com/en/hi/groups/personalized/tushthh\\_neu/index.jhtml](http://www.hilton.com/en/hi/groups/personalized/tushthh_neu/index.jhtml)

To receive the meeting rate use the group code of NEU.

### Deposit Guarantee

Authorization to charge one (1) night's room and tax as a deposit to your credit card will serve as a guarantee for your room reservation.

### Cancellation Information

Reservation may be cancelled until seven (7) days prior to arrival. After this time, a penalty of one night's room and tax will be charged.

### Early Departure

To avoid an early checkout fee you should advise the Hotel at or before check-in of any change in planned length of stay. The Hotel will waive any early checkout fee if the guest must leave early due to personal, family or business necessity.

### Directions

#### From Tucson International Airport

Follow I-10 West to Ina Road (Exit 248). Turn right on Ina Rd. and travel east for about 5.3 miles to Oracle Road. Turn left onto Oracle and continue 2.5 miles to El Conquistador Way. Turn right and the Resort will be on your right.

### From Phoenix

Follow I-10 East to Tangerine Road (Exit 240). Turn left on Tangerine Rd. and travel east for about 13.5 miles to Oracle Road. Turn right onto Oracle and continue 3.3 miles to El Conquistador Way. Turn left and the Resort will be on your right.

If you need further directions please call us at **(520) 544-5000**.

### Children's Program

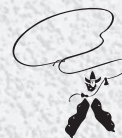

The Hilton will offer "Camp Quail" during the meeting for a minimum of 10 or more children. The cost ranges from \$40 for a half day with lunch to \$60 for a full day. It offers themed activities and

adventures for children 4-12 years old. Please contact the ANPA office at: [anpa@osu.edu](mailto:anpa@osu.edu) if you are interested.

### Travel Information

For travel information contact Geraci Travel at **800-741-0719**, 8:30 a.m. to 5:00 p.m. Monday through Friday or by e-mail at: [jack@geracitravel.com](mailto:jack@geracitravel.com). Specify that you are with ANPA. Please plan ahead because the best rates are offered with 60 day advanced purchase tickets. Geraci Travel has negotiated discounts from several airlines and rental car companies in the Tucson area.

You can also make travel arrangements directly on the following web site: [www.airtucson.com](http://www.airtucson.com)

### Ground Transportation

The Hilton El Conquistador offers a dedicated transport service from the airport to the hotel. Vehicles are scheduled based on demand. The special meeting rate will be \$30.00 + tax each way per person. All transportation requests should be faxed no later than 10 days prior to arrival. Please contact the ANPA office at: [anpa@osu.edu](mailto:anpa@osu.edu) for the request forms. Taxi fares range between \$45 and \$60. Rental car information will be available on the ANPA web site: [www.anpaonline.org](http://www.anpaonline.org).

# Registration Form PLEASE PRINT

Name \_\_\_\_\_  M.D.  Ph.D.  D.O.  Other

Institution \_\_\_\_\_

Address \_\_\_\_\_ City \_\_\_\_\_

State \_\_\_\_\_ Zip/Postal Code \_\_\_\_\_ Country \_\_\_\_\_

Telephone \_\_\_\_\_ Fax \_\_\_\_\_

E-mail \_\_\_\_\_

**Check One:**

- Member:  ANPA  INS  SBCN  
 Non-Member  
 Member Trainee  
 Non-Member Trainee (letter from Director of Training required)

**18th Annual Meeting registration fee includes: continuing education certificates of credit (CME and CE), attendance at all sessions, Welcome Reception, breakfasts, lunches and Annual Banquet**

- The Neuropsychiatry of Subcortical Disorders Part I  
 The Neuropsychiatry of Subcortical Disorders Part II  
 White Matter Matters

| Workshops          | Rec'd by 1/12/07 | Rec'd after 1/12/07 | On-site    |
|--------------------|------------------|---------------------|------------|
| Member             | \$100 each       | \$125 each          | \$150 each |
| Non-member         | \$125 each       | \$150 each          | \$175 each |
| Member trainee     | \$70 each        | \$90 each           | \$110 each |
| Non-member trainee | \$80 each        | \$100 each          | \$120 each |

**Workshop Total:** \$ \_\_\_\_\_

| 18th Annual Meeting     | Rec'd by 1/12/07 | Rec'd after 1/12/07 | On-site |
|-------------------------|------------------|---------------------|---------|
| Member *                | \$335            | \$385               | \$435   |
| Non-member              | \$465            | \$515               | \$565   |
| Trainee member**        | \$215            | \$265               | \$315   |
| Trainee-non-member      | \$240            | \$290               | \$340   |
| Combination***          | \$435            | \$485               | \$535   |
| Combination trainee**** | \$270            | \$320               | \$370   |

**Meeting Total:** \$ \_\_\_\_\_

- \* 2007 dues must be paid  
 \*\* 2007 dues must be paid and a Letter from Directory of Training must be included  
 \*\*\* This is a special opportunity for NEW members. Membership in ANPA will be \$175. Become a member of ANPA, and register for the annual meeting for a reduced combined fee  
 \*\*\*\* This is a special opportunity for NEW trainee members. Trainee membership is usually \$70. When you become a member and register for the meeting membership is \$55.

**Guest Tickets** - Please note that meals are included with registration. Please indicate guest tickets only

|                            |                 |
|----------------------------|-----------------|
| Sunset Reception           | \$35 each       |
| Annual Banquet             | \$75 each       |
| <b>Guest Tickets Total</b> | <b>\$</b> _____ |

**TOTAL DUE: WORKSHOPS + MEETING + GUEST TICKETS** \$ \_\_\_\_\_

You may pay by check, Visa or MasterCard (please complete information below for credit card payments). Make all checks payable to the American Neuropsychiatric Association. Please complete this form and send payment to: ANPA, 700 Ackerman Rd, Suite 625, Columbus, OH 43202. Or fax credit card payment to: 614-263-4366

Check #: \_\_\_\_\_ Amount: \$ \_\_\_\_\_

Credit Card Payment:  VISA  Mastercard

Card Number: \_\_\_\_\_ Exp. Date: \_\_\_\_\_

Cardholder's Name: (as on card) \_\_\_\_\_

Cardholder's Signature: \_\_\_\_\_ Amount: \$ \_\_\_\_\_

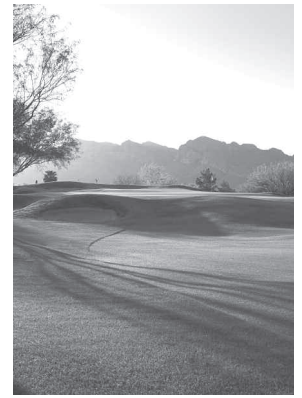

Online registration is now available at:

**www.anpaonline.org**

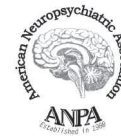

Or mail Annual Meeting/Workshop registration form and payment to:

**American Neuropsychiatric Association**  
 700 Ackerman Rd, Suite 625  
 Columbus, OH 43202

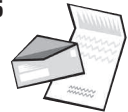

**Mail-in payment must be received by February 5, 2007.**

**Early Registration Deadline - January 12, 2007.**

If you have any questions about the meeting or for general information about ANPA, please contact Sandy Bornstein at the ANPA Office.

**Phone: 614-447-2077**  
**Fax: 614-263-4366**  
**E-mail: anpa@osu.edu**  
**Web Site : www.anpaonline.org**

*Please note: There will be a cancellation fee of \$50.*

Contact the ANPA Office for arrangements regarding mobility assistance or special dietary requirements.

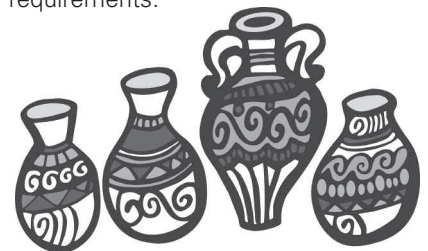

**Registration Form**

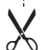

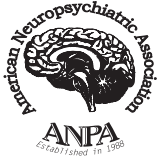

# American Neuropsychiatric Association

## ABOUT ANPA

The American Neuropsychiatric Association (ANPA), established in 1988, is an organization of professionals in neuropsychiatry and clinical neurosciences. Our mission is to apply neuroscience for the benefit of people. We work together in a collegial fashion to advance knowledge of brain-behavior relations, provide a forum for learning, and promote excellent, scientific and compassionate care.

The strength of the organization is our diversity of membership, which is comprised of professionals in neuropsychiatry, behavioral neurology, neuropsychology, neuroradiology, neuropathology, and neurosurgery as well as the basic neurosciences, who share clinical and/or academic interests in neuropsychiatry. The interdisciplinary nature of the membership encourages collaborations among educators, clinicians, researchers, students and trainees in research presentations, symposia, workshops and/or continuing education courses. Students, fellows and other trainees are encouraged to participate and are offered discount membership and conference fees. The *Journal of Neuropsychiatry and Clinical Neurosciences (JNP)* is the official publication of the organization, and is a benefit of membership.

ANPA holds its annual scientific meeting in the early spring, and provides up to 30 CME / CE credits. Joint meetings with the International Neuropsychological Society, the British Neuropsychiatry Association, and the International Neuropsychiatry Congresses have added an international dimension to the ANPA conferences. Members are encouraged to submit their work for presentation at these annual meetings. Travel awards are available for promising young investigators. Annual meeting abstracts and proceedings are published in *JNP*.

In 1999 the designation of Fellow of the American Neuropsychiatric Association was established in recognition of special achievement in neuropsychiatry, behavioral neurology, neuropsychology or the clinical neurosciences.

In 2001 the ANPA Career Development Award Program was instituted. It recognizes advanced trainees in psychiatry, neurology, or neuropsychology whose accomplishments during training offer promise of a successful career in neuropsychiatry and the clinical neurosciences. The award will support costs associated with participation in two consecutive Annual Meetings, establish an informal mentoring relationship between the awardee and one ANPA Fellow and facilitate the awardee's involvement in ANPA.

ANPA has been actively engaged in efforts toward creation of subspecialty certification for neuropsychiatry including developing a core curriculum and guidelines for training in neuropsychiatry. In March 2004, a joint application from ANPA and the Society for Behavioral and Cognitive Neurology (SBCN) was submitted to the Unified Council for Neurologic Subspecialties (UCNS) for recognition of the Neurological Subspecialty Area (NSA) of Behavioral Neurology & Neuropsychiatry ([www.ucns.org](http://www.ucns.org)). On June 30, 2004 Behavioral Neurology & Neuropsychiatry was approved as a single subspecialty. The first certification exam in Behavioral Neurology & Neuropsychiatry will be offered in September 2006.

## BENEFITS OF MEMBERSHIP

- **Subscription** to the *Journal of Neuropsychiatry and Clinical Neurosciences (JNP)*
- **Online journal** subscriptions at a reduced price
- **Opportunities** for presentation at the annual meeting with accepted abstracts published in the *JNP*
- Significantly **reduced registration fees** at the annual meeting
- Regular **mailings** including newsletters, information about job opportunities and pertinent information about upcoming meetings
- **Discounted membership fees** for trainees
- **Collaboration** in clinical, educational and research activities and the opportunity to interact with senior colleagues
- Extensive **Bibliography** in Neuropsychiatry
- **Reduced journal subscription rates** from related organizations

## ANPA COMMITTEES

**The Education Committee** The ANPA Education Committee supports efforts related to education and practice of high quality care and research in neuropsychiatry. They have developed a model curriculum and standards for accreditation of neuropsychiatry fellowship programs. The committee has developed and maintains an updated bibliography of neuropsychiatry-relevant references.

**The Membership Committee** recruits new members for ANPA, reviews applications of all potential members, oversees collection of yearly membership dues, reviews Fellow applications and hosts a new member breakfast at the annual ANPA meeting.

**The Research Committee** reviews and publishes articles on research issues in neuropsychiatry. They have developed a Research Registry that can be accessed through the ANPA website. Past projects include position statements on the clinician-scientist in neuropsychiatry, and topical reviews.

**The Scientific Program Committee** plans the ANPA Annual Meeting.

**The Website Committee** The ANPA website is located at [www.anpaonline.org](http://www.anpaonline.org).

### JOIN ANPA NOW!

**You can now join online at: [www.anpaonline.org](http://www.anpaonline.org)**

Candidates should have an interest in the field of clinical neuroscience.

Online: Go to [www.anpaonline.org](http://www.anpaonline.org)

Mail: Please send your application, CV and payment to:  
ANPA, 700 Ackerman Rd., Ste 625, Columbus, OH 43202

#### More information

Website: [www.anpaonline.org](http://www.anpaonline.org)

Email: [anpa@osu.edu](mailto:anpa@osu.edu)

Phone: 614-447-2077

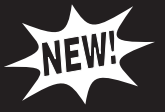

# Key Psychiatric Resources

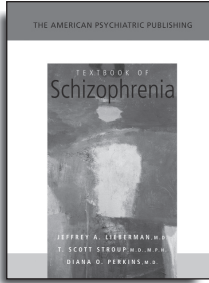

## The American Psychiatric Publishing Textbook of Schizophrenia

Edited by Jeffrey A. Lieberman, M.D.,  
T. Scott Stroup, M.D., M.P.H., and  
Diana O. Perkins, M.D., M.P.H.

Experts from North America and Europe address the complexity of schizophrenia in a comprehensive volume that leads readers from historical overview and epidemiology to consideration of comorbid conditions. It covers genetic and environmental causes, describes leading theories of schizophrenia, and explores the involvement of abnormal brain circuitry and the results of the latest neuroimaging studies.

2006 • 464 pages • ISBN 1-58562-191-9 • Hardcover • \$95.00  
Item #62191

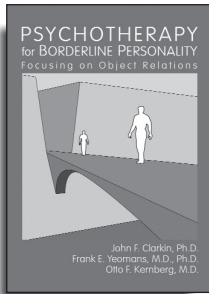

## Psychotherapy for Borderline Personality Focusing on Object Relations

John F. Clarkin, Ph.D.,  
Frank E. Yeomans, M.D., Ph.D., and  
Otto F. Kernberg, M.D.

*Psychotherapy for Borderline Personality* describes principles of Transference-Focused Psychotherapy (TFP) intervention and contains a wealth of practical guidelines on how to apply TFP to individual patients on a session-by-session basis. This groundbreaking treatment manual focuses on the tasks of the therapist and the sequence of responses by the patient for each phase of treatment. Recognizing that patients with borderline personality organization (BPO) start treatment at different points of their pathology, the authors provide an expansive description of the treatment course with high-level and low-level BPO patients, making the book relevant to a wide range of clinical situations.

2006 • 416 pages • ISBN 1-58562-210-9 • Hardcover • \$55.00  
Item #62210

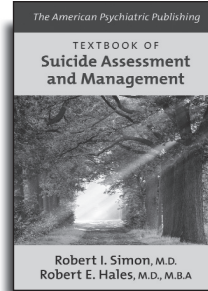

## The American Psychiatric Publishing Textbook of Suicide Assessment and Management

Edited by Robert I. Simon, M.D., and  
Robert E. Hales, M.D., M.B.A.

“Dr. Robert I. Simon has done it again! He has joined with Dr. Robert E. Hales to provide us with a most comprehensive textbook. The authors of the various chapters are some of the finest clinicians and writers on suicide. This is a very readable and complete textbook that has both breadth and depth with respect to the subject of suicide. It is a welcome addition to every psychiatrist’s library.”

— Robert L. Sadoff, M.D., Director, Center for Studies in Legal Psychiatry, University of Pennsylvania School of Medicine, Philadelphia, Pennsylvania

2006 • 688 pages • ISBN 1-58562-213-3 • Hardcover • \$85.00  
Item #62213

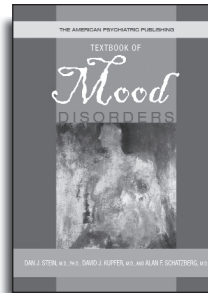

## The American Psychiatric Publishing Textbook of Mood Disorders

Edited by Dan J. Stein, M.D., Ph.D.,  
David J. Kupfer, M.D., and  
Alan F. Schatzberg, M.D.

Psychiatrists and other mental health care and medical professionals can now turn to a truly authoritative, up-to-date reference for current information about mood disorders. *The American Psychiatric Publishing Textbook of Mood Disorders* presents the state of the art in diagnosis, psychobiology, pharmacotherapy, and psychotherapy across the vast spectrum of mood disorders, from historical perspectives, rating scales and cultural, gender, and age differences, to neurochemistry and cutting-edge treatments in augmentation strategies and brain stimulation.

2006 • 792 pages • ISBN 1-58562-151-X • Hardcover • \$119.00  
Item #62151

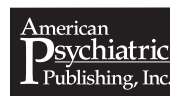

The *First* and *Last* Word in Psychiatry  
1000 Wilson Boulevard  
Suite 1825, Arlington, VA 22209-3901  
Phone: 703-907-7322 or 1-800-368-5777  
Mon.-Fri., 9 am to 5:30 pm, ET  
Fax: 703-907-1091 | Email: appi@psych.org  
[www.appi.org](http://www.appi.org)

Please reference priority code AH620 when ordering.



**HEAD**  
**Department of Psychiatry**  
**University of Illinois at Chicago (UIC)**

The University of Illinois at Chicago College of Medicine invites applicants and nominations for the position of Head of the Department of Psychiatry. The Department is a national leader, ranked 17th in NIH funding, first in Illinois, and second in the Midwest. The Department includes five subspecialty programs: Child Psychiatry, Mood & Anxiety Disorders, Neurobehavior, Psychosis, and Women's Mental Health.

Department faculty have achieved national recognition for research, clinical services and training programs in many areas, including: autism; biological substrate of suicide; childhood bipolar disorder; neurobiology of alcoholism; neurobiology of depression; neurobiology & prevention of schizophrenia; neurosteroids, GABA & psychopathology; oxytocin and behavior; perinatal depression; psychiatric effects of HIV infection; psychosocial rehabilitation; sex hormones & cognition; youth violence; and, workplace harassment. The department is home to three institutes, the Institute for Juvenile Research, the Neuropsychiatric Institute and the Psychiatric Institute, and seven centers, including a National Research and Training Center for Psychiatric Disabilities, the Center for Cognitive Medicine, and the Brain-Body Center. The department has 108 full time faculty members, a well-established residency program, and a large in- and out-patient base.

The ideal candidate will be board certified in Psychiatry, have a history of established extramurally funded research, experience in administration of both basic and clinical science programs, is a nationally known, respected academician, and have had successful experience with complex organizations and collaborative work environments.

For fullest consideration, nominations and/or letters of application, along with CV and three letters of reference, should be submitted by December 31, 2006 to:

**Dimitri T. Azar, MD, Field Chair of Ophthalmologic Research**  
**Professor and Head, Chair of the Head of Psychiatry Search Committee**  
**University of Illinois at Chicago**  
**Department of Ophthalmology and Visual Sciences**  
**MC 648, 1855 West Taylor Street**  
**Chicago, IL, 60612**  
**Email: [dazar@uic.edu](mailto:dazar@uic.edu)**

**UIC IS AN AFFIRMATIVE ACTION / EQUAL OPPORTUNITY EMPLOYER**

---

## Statement of Ownership, Management, and Circulation

# The Journal of Neuropsychiatry and Clinical Neurosciences

---

Publication number: 0895-0172  
 Filing date: September 29, 2006  
 Issue frequency: quarterly  
 No. of issues published annually: 4  
 Annual subscription price: \$157.00  
 Address where published, and name and headquarters address of publisher:  
 American Psychiatric Publishing, Inc., 1000 Wilson Blvd., Suite 1825, Arlington, VA 22209  
 Contact: Roger Domras, (703) 907-8544  
 Editor: Stuart C. Yudofsky, M.D., above address  
 Managing editor: Sandra Patterson, above address

Owner: American Psychiatric Publishing, Inc., 1000 Wilson Blvd., Suite 1825, Arlington, VA 22209  
 Known bondholders, mortgagees, and other security holders owning or holding 1% or more of total amount of bonds, mortgages, or other securities: none  
 Purpose, function, and nonprofit status for federal income tax purposes: has not changed during preceding 12 months  
 Publication name: *The Journal of Neuropsychiatry and Clinical Neurosciences*  
 Issue date for circulation data below: Summer 2006

---

### Circulation

---

|                                                                                                      | Average No. Copies<br>Each Issue During<br>Preceding 12 Months | Actual No. Copies of<br>Single Issue Published<br>Nearest to Filing Date |
|------------------------------------------------------------------------------------------------------|----------------------------------------------------------------|--------------------------------------------------------------------------|
| Total no. copies (net press run)                                                                     | 1,774                                                          | 1,689                                                                    |
| Paid and/or requested circulation                                                                    |                                                                |                                                                          |
| Paid/requested outside-county mail subscriptions                                                     | 875                                                            | 939                                                                      |
| Paid in-county subscriptions                                                                         | 0                                                              | 0                                                                        |
| Sales through dealers, carriers, street vendors, counter sales, and other non-USPS paid distribution | 187                                                            | 189                                                                      |
| Other classes mailed through the USPS                                                                | 0                                                              | 0                                                                        |
| Total                                                                                                | 1,062                                                          | 1,128                                                                    |
| Free distribution by mail                                                                            |                                                                |                                                                          |
| Outside-county                                                                                       | 104                                                            | 146                                                                      |
| In-county                                                                                            | 0                                                              | 0                                                                        |
| Other classes mailed through the USPS                                                                | 0                                                              | 0                                                                        |
| Free distribution outside the mail                                                                   | 101                                                            | 101                                                                      |
| Total free distribution                                                                              | 205                                                            | 247                                                                      |
| Total distribution                                                                                   | 1,267                                                          | 1,375                                                                    |
| Copies not distributed                                                                               | 507                                                            | 314                                                                      |
| Total                                                                                                | 1,774                                                          | 1,689                                                                    |
| Percent paid and/or requested circulation                                                            | 83.8%                                                          | 82.0%                                                                    |

I certify that all information furnished on this form is true and complete. I understand that anyone who furnishes false or misleading information on this form or who omits material or information requested on the form may be subject to criminal sanctions (including fines and imprisonment) and/or civil sanctions (including civil penalties). Signed by Kathy Stein, September 29, 2006.

---

# The doctor is in.

Whether you are a practicing physician or talented applicant, the American Psychiatric Association (APA) Job Bank is your psychiatric job placement resource.

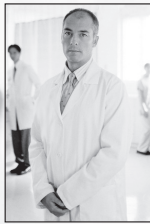

## IN FOCUS

### Candidates:

Post your résumé online for free.  
Search psychiatric jobs by specialty or location.  
Gain access to employment tools.

### Employers:

Post psychiatric career opportunities quickly and easily.  
Tap into an online résumé database.  
Find the right candidate for your psychiatric position.

## IN THE KNOW

Access sample cover letters and curriculum vitae, career development articles, salary surveys, interview worksheets and other tools on the APA Job Bank.

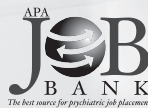

Visit [www.psych.org/jobbank](http://www.psych.org/jobbank) today.

Advertise your psychiatric opportunity in APA's *Psychiatric News* or *Psychiatric Services* classifieds and with the APA Job Bank online to receive a 10 percent discount on both. For more information, call (888) 35-PSYCH ext. 7330 or direct at (703) 907-7330, or email [classads@psych.org](mailto:classads@psych.org).

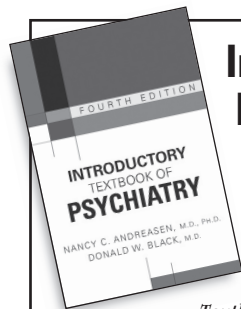

## Introductory Textbook of Psychiatry, Fourth Edition

Nancy C. Andreasen, M.D., Ph.D., and  
Donald W. Black, M.D.

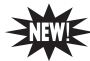

An established resource, the *Introductory Textbook of Psychiatry* has been thoroughly revised to make it an even more effective text. This edition is more practical and easier to use. The authors continue to interweave recent advances in psychiatry with the core knowledge that students new to the field need—from grasping the neurobiology and genetics of mental illness to understanding the DSM system to assessing patients.

Useful as either an introductory text or a primary reference, the *Textbook* encourages students to appreciate the art and science of contemporary psychiatry and to enjoy working with psychiatric patients. And as a concise summary of the field, it also serves as a reliable and an eminently readable refresher for busy practitioners.

2006 • 688 pages • ISBN 1-58562-223-0 • Hardcover • \$78.00

2006 • 688 pages • ISBN 1-58562-272-9 • Paperback • \$58.00

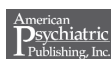

The *First and Last* Word in Psychiatry  
1000 Wilson Boulevard, Suite 1825  
Arlington, VA 22209-3901

Phone: 703-907-7322 or 1-800-368-5777, Mon.-Fri., 9 AM to 5:30 PM, ET  
Fax: 703-907-1091 | Email: [appi@psych.org](mailto:appi@psych.org) | Web: [www.appi.org](http://www.appi.org)

Please reference priority code **AH637** when ordering.

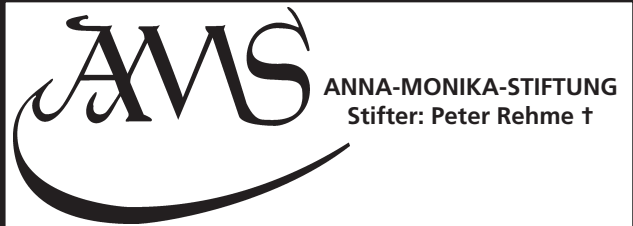

## 21ST PRIZE COMPETITION announced by the

### **ANNA-MONIKA FOUNDATION**

for the investigation of the biological substrate and functional disturbances of depression by approval of the Minister of the Interior of Northrhine-Westphalia, Düsseldorf, 9 June, 1965

The Foundation announces its prize to the amount of

**EURO 25.000**

The studies should be carried out in close co-operation with a department of psychiatry at a university or an equivalent scientific institution. The papers should give information about recent advances in knowledge that are helpful in promoting treatment and may open new paths of progress. The papers may be written in German or English and should be submitted to the Chairman of the Committee, Prof. Dr. Dr. F. A. Henn, former Director of the Central Institute of Mental Health, J 5, D-68159 Mannheim – preferably by e-mail to [wolff@zi-mannheim.de](mailto:wolff@zi-mannheim.de). Please add CV and a summary of achievements in the field; hitherto unpublished studies or papers published in an international professional journal within the past two years may also be submitted. **Deadline for submission to the Committee is 31 March 2007.**

To help the Committee to come to a speedy decision, it is requested that a maximum of three publications in four copies as well as a summarising report (approx. 600 words) of the studies submitted for the competition should be included. A decision concerning the awardees will be made by the end of July 2007. If, in the opinion of the Committee, no papers of sufficient merit are submitted, it reserves the right to present no award. Qualified individuals are invited to submit applications. In addition, the nomination of candidates by others is encouraged. In case of groups the specific contribution of each individual should be clearly stated.

[www.anna-monika-stiftung.com](http://www.anna-monika-stiftung.com)  
[www.zi-mannheim.de](http://www.zi-mannheim.de)

# Enhance Your DSM Library with These Books!

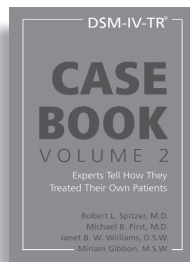

## DSM-IV-TR® Casebook, Volume 2 Experts Tell How They Treated Their Own Patients

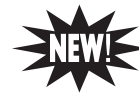

Edited by Robert L. Spitzer, M.D., Michael B. First, M.D.,  
Miriam Gibbon, M.S.W., and Janet B. W. Williams, D.S.W.

A remarkable 53 contributors, whose cases represent the full range of psychological, psychosocial, and pharmacological treatment approaches, include in their case studies a summary of the patient's presenting symptoms and problems, history of present illness and past history, the expert's differential diagnosis and reasons for choosing a particular therapy, their initial treatment goals, how they explained the treatment to the patient and the patient's reaction, what actually went on in the sessions, the expert's thoughts and feelings during the treatment process, and how the patient changed over time.

2006 • 448 pages • ISBN 1-58562-219-2 • Hardcover • \$62.00 • Item #62219

2006 • 448 pages • ISBN 1-58562-220-6 • Paperback • \$42.00 • Item #62220

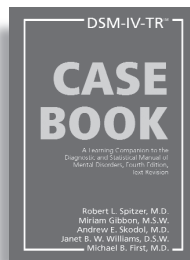

## DSM-IV-TR® Casebook

**A Learning Companion to the Diagnostic and Statistical Manual of Mental Disorders,  
Fourth Edition, Text Revision**

Robert L. Spitzer, M.D., Miriam Gibbon, M.S.W., Andrew E. Skodol, M.D.,  
Janet B. W. Williams, D.S.W., and Michael B. First, M.D.

Updated for *DSM-IV-TR*, the *DSM-IV-TR® Casebook* facilitates the transition from the concepts and terminology of *DSM-IV-TR* to actual clinical situations by providing clinical vignettes for illustration and study. It helps both students and clinicians visualize *DSM-IV-TR* disorders through the use of clinical vignettes. Each is followed by a discussion of the *DSM-IV-TR* differential diagnosis. The *DSM-IV-TR® Casebook* is highly recommended for clinicians to help them develop a deeper comprehension of all diagnostic categories.

2002 • 592 pages • ISBN 1-58562-058-0 • Hardcover • \$79.00 • Item #62058

2002 • 592 pages • ISBN 1-58562-059-9 • Paperback • \$58.00 • Item #62059

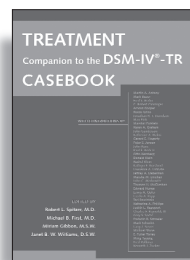

## Treatment Companion to the DSM-IV-TR® Casebook

Edited by Robert L. Spitzer, M.D., Michael B. First, M.D.,  
Miriam Gibbon, M.S.W., and Janet B. W. Williams, D.S.W.

One of the main purposes of psychiatric diagnosis is to guide treatment selection. Although the *DSM-IV-TR® Casebook* discussions often briefly mention treatment and follow-up, the focus is almost exclusively on diagnosis. This *Treatment Companion* takes the next step: for 34 cases (all but three from the *DSM-IV-TR® Casebook*), world-renowned experts discuss their approach to treatment for a case in their specialty area—both how they would manage the specific case and the general principles of treatment for that disorder.

2004 • 352 pages • ISBN 1-58562-194-3 • Hardcover • \$62.00 • Item #62194

2004 • 352 pages • ISBN 1-58562-139-0 • Paperback • \$42.00 • Item #62139

**SET** of Treatment Companion to the DSM-IV-TR® Casebook and DSM-IV-TR® Casebook (hardcover) Item #5083 • \$120.00

**SET** of Treatment Companion to the DSM-IV-TR® Casebook and DSM-IV-TR® Casebook (paperback) Item #5084 • \$85.00

**SET** of DSM-IV-TR® Casebook and DSM-IV-TR® Casebook, Volume 2 (paperback) Item #5097 • \$85.00

**SET** of DSM-IV-TR® Casebook, DSM-IV-TR® Casebook, Volume 2, and Treatment Companion to the DSM-IV-TR® Casebook (paperback) Item #5098 • \$121.00

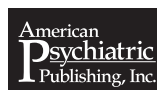

The *First* and *Last* Word in Psychiatry

**Toll-Free: 1-800-368-5777** ■ Order online: [www.appi.org](http://www.appi.org)

Please reference priority code AH640 when ordering.

# Psychiatry *1844-1997* Legacy Collection

- \* Available for purchase Spring 2006; one-time fee buys access to entire collection in perpetuity
- \* Dates back to 1844 and includes *The American Journal of Psychiatry*, the oldest continuously published medical specialty journal in the United States
- \* Completes your current collection with content going back to Volume I, Issue I
- \* Fully searchable; high-resolution scanning of original printed pages ensures easy online reading and printing

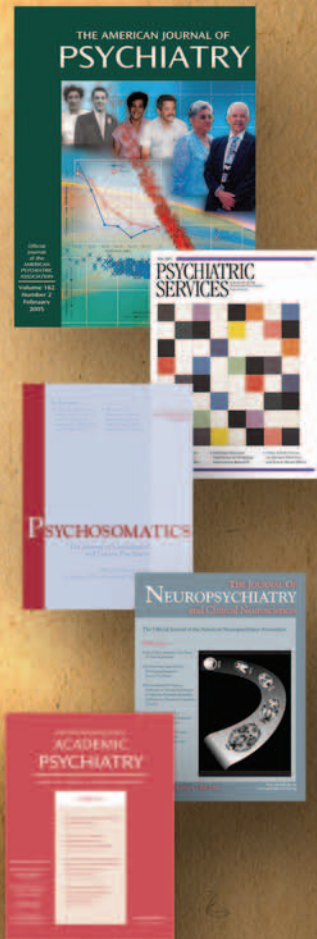

“As psychiatrists know better than perhaps any other medical specialty, studying the past is the best way to understand the present and to change the future.”

— Nancy C. Andreasen, M.D., Ph.D.  
Past Editor, AJP

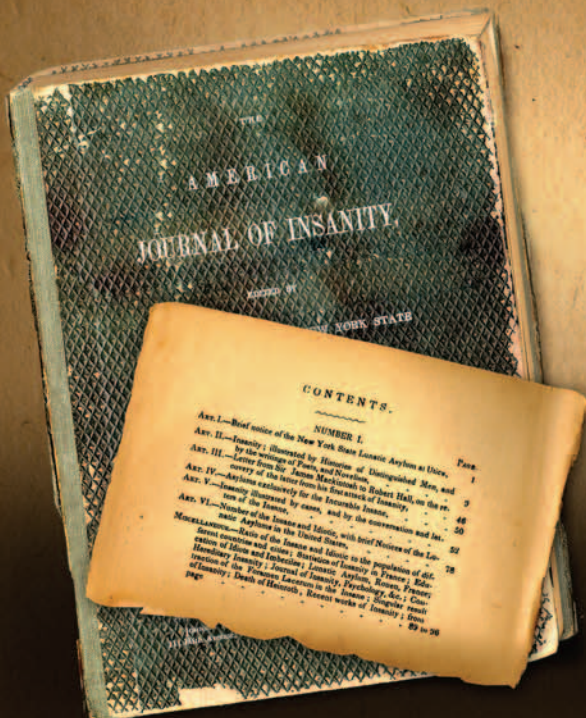

| Psychiatry Legacy Collection Journals                                                                                                                                 | Volumes Included | Years Covered |
|-----------------------------------------------------------------------------------------------------------------------------------------------------------------------|------------------|---------------|
| <b>The American Journal of Psychiatry</b>                                                                                                                             | 1–153            | 1844–1996     |
| Volumes 1 (1844) thru 77 (1921) published as <i>The American Journal of Insanity</i>                                                                                  |                  |               |
| <b>Academic Psychiatry</b>                                                                                                                                            | 13–21            | 1989–1997     |
| NOT INCLUDED: Volumes 1 thru 12 (1988) published as <i>Journal of Psychiatric Education</i> and owned by another publisher                                            |                  |               |
| <b>Journal of Neuropsychiatry &amp; Clinical Neurosciences</b>                                                                                                        | 1–9              | 1989–1997     |
| <b>Journal of Psychotherapy Practice and Research</b>                                                                                                                 | 1–6              | 1992–1997     |
| <b>Psychiatric Services</b>                                                                                                                                           | 1–48             | 1950–1997     |
| Volumes 1 (1950) through 15 (1964) published as <i>Mental Hospitals</i> ; Volumes 16 (1965) through 45 (1994) published as <i>Hospital &amp; Community Psychiatry</i> |                  |               |
| <b>Psychosomatics</b>                                                                                                                                                 | 1–38             | 1960–1997     |

For more information or a price quote for your institution  
call 800-368-5777 ext. 8538 or 703-907-8538  
or email [institutions@psych.org](mailto:institutions@psych.org)

AH623
