# THE JOURNAL OF NEUROPSYCHIATRY and Clinical Neurosciences

The Official Journal of the American Neuropsychiatric Association

## In this issue:

- The Value of Quantitative Electroencephalography in Clinical Psychiatry: A Report by the Committee on Research of the American Neuropsychiatric Association
- Aggression and Quantitative MRI Measures of Caudate in Patients With Chronic Schizophrenia or Schizoaffective Disorder
- The Neuropsychiatric Profile of Addison's Disease: Revisiting a Forgotten Phenomenon
- A Pilot Study of Quetiapine Treatment of Aggression Due to Traumatic Brain Injury

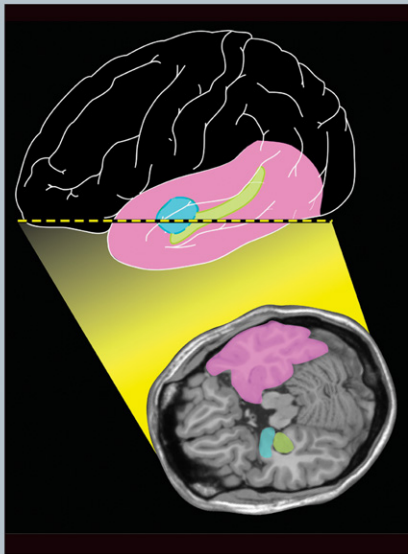

Volume 18 • Number 4 • Fall 2006

Visit our web site at:  
[neuro.psychiatryonline.org](http://neuro.psychiatryonline.org)
